# Supplementary material for: Synthesis of Gold Nanoparticles to Capture Lifelike Proteins: Application on the Multichannel Sensor Array Design
Source: Hindawi journal article supplement (doi:10.1155/2018/8540172), 2018-01-01
Supplement: f1 [file 8540172.f1.pdf]

# Supplementary Information

## **Synthesis of Gold Nanoparticles to Capture Lifelike Proteins: Application on the Multichannel Sensor Array Design**

Yumin Leng<sup>\*,1</sup> Chunhua Ma,<sup>2</sup> Wentai Zhang,<sup>2</sup> Kecheng Liu,<sup>3</sup> and Zhiwen Lu<sup>1</sup>

<sup>1</sup>College of Physics and Electronic Engineering, Nanyang Normal University, Nanyang 473061, China

<sup>2</sup>College of Mechanical and Electronic Engineering, Nanyang Normal University, Nanyang 473061, China

<sup>3</sup>College of Chemistry and Pharmaceutical Engineering, Nanyang Normal University, Nanyang 473061, China

Corresponding email: [lengyumin@nimte.ac.cn](mailto:lengyumin@nimte.ac.cn), yumin\_leng@126.com

## Supplementary Figures

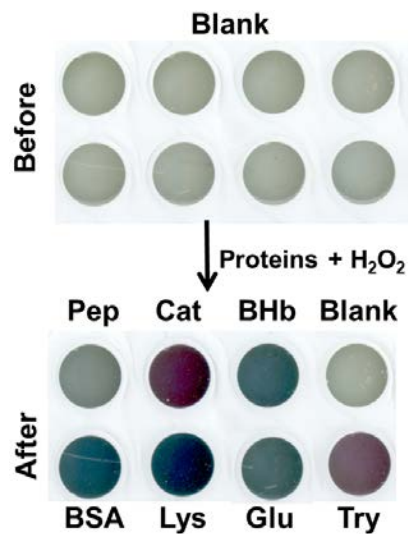

**FIGURE S1:** Color images of the Col-Au(I) solution obtained before and after exposure to proteins and H<sub>2</sub>O<sub>2</sub>. The randomly selected proteins (10 µg/mL) are pepsin (Pep), catalase (Cat), bovine hemoglobin (BHb), bovine serum albumin (BSA), lysozyme (Lys), glucoamylase (Glu) and trypsin (Try).

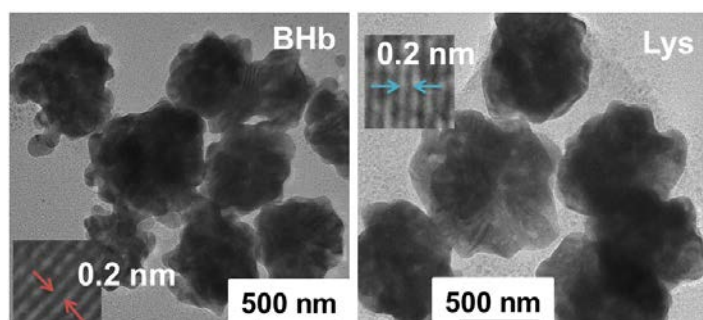

**FIGURE S2:** TEM and high resolution TEM (HRTEM) images of GNPBs obtained by the rapid reduction of Au(I) to GNPBs, which are overgilt on the protein structures (e.g. BHb and Lys interacted with Col).

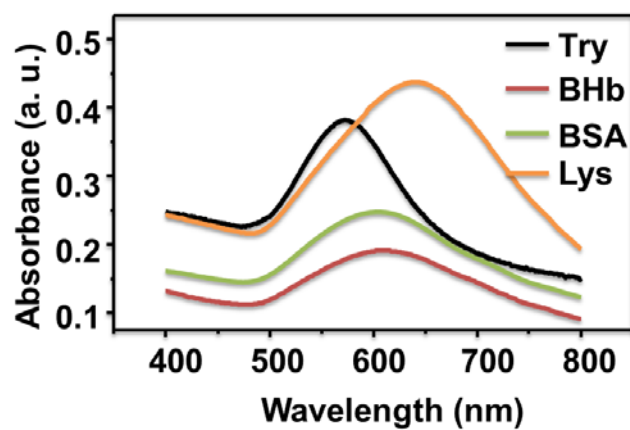

**FIGURE S3:** The UV-vis absorption spectra of GNPs obtained by the in-situ reduction of Au(I) to GNPs in the protein systems (the signed proteins interacted with Col).

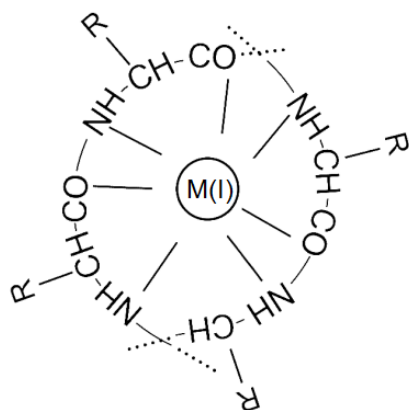

**FIGURE S4:** Schematic illustration of the interlocking rings directed by monovalent metal ions (M(I)) in Glu.

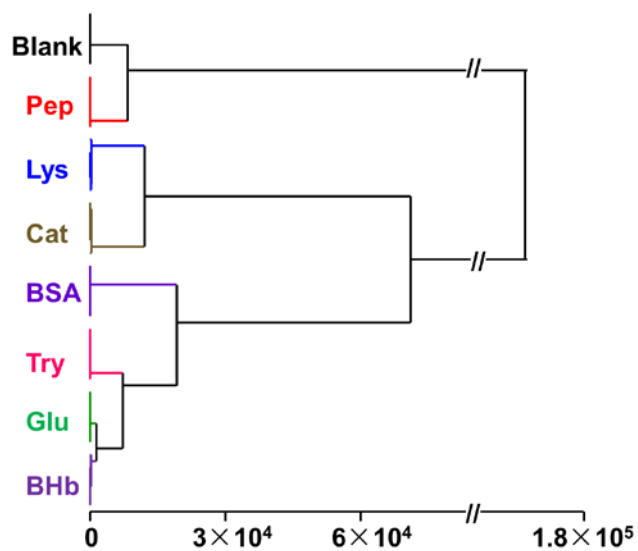

**FIGURE S5:** HCA analysis for the discrimination of proteins (10  $\mu\text{g/ml}$ ) based on the  $\Delta\text{RGB}$  variations.

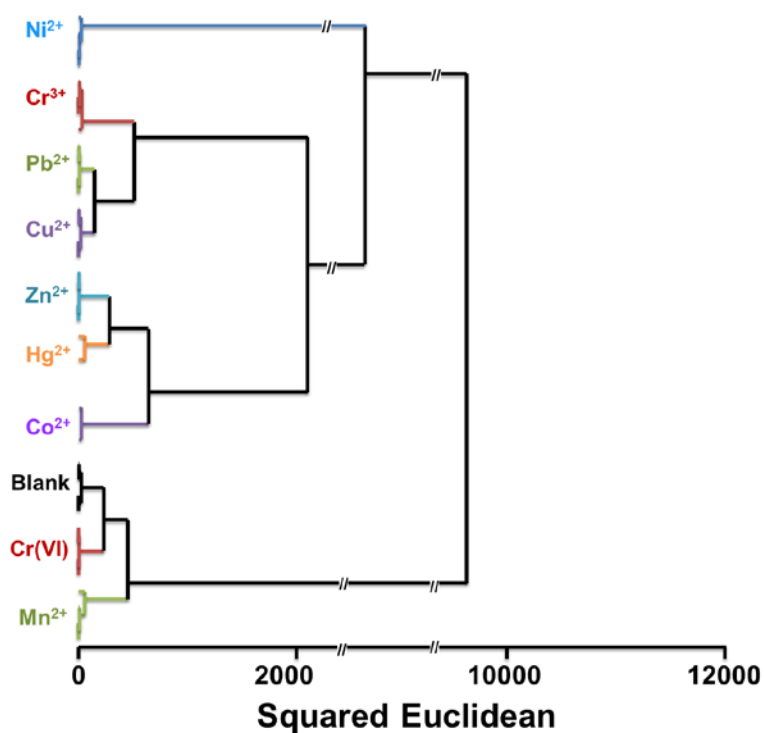

**FIGURE S6:** HCA analysis for the discrimination of heavy metal ions (0.77  $\mu\text{M}$ ) based on the  $\Delta\text{RGB}$  variations.

## Supplementary Tables

**TABLE S1:** Database of the  $\Delta$ RGB alterations of the Col-Au(I) solution in the absence and presence of seven proteins (10  $\mu$ g/ml) and H<sub>2</sub>O<sub>2</sub>.

|         | $\Delta$ R | $\Delta$ G | $\Delta$ B |
|---------|------------|------------|------------|
| Blank-1 | -2.676     | -1.238     | 2.271      |
| Blank-2 | -2.932     | -1.680     | 0.634      |
| Blank-3 | -1.061     | -0.195     | 2.486      |
| Blank-4 | -1.222     | -0.481     | 1.579      |
| Blank-5 | -1.133     | -0.947     | 0.572      |
| BHb-1   | 106.903    | 77.568     | 54.307     |
| BHb-2   | 108.563    | 78.478     | 56.817     |
| BHb-3   | 111.316    | 78.732     | 55.141     |
| BHb-4   | 111.241    | 78.974     | 55.654     |
| BHb-5   | 118.508    | 82.099     | 58.648     |
| Cat-1   | 88.710     | 165.214    | 99.803     |
| Cat-2   | 96.386     | 167.844    | 106.002    |
| Cat-3   | 98.821     | 167.079    | 112.614    |
| Cat-4   | 97.375     | 164.521    | 111.126    |
| Cat-5   | 97.080     | 168.771    | 117.860    |
| Glu-1   | 87.164     | 67.589     | 53.196     |
| Glu-2   | 92.365     | 69.209     | 54.085     |
| Glu-3   | 92.879     | 70.297     | 55.669     |
| Glu-4   | 91.154     | 68.216     | 53.542     |
| Glu-5   | 89.197     | 68.451     | 54.450     |
| Lys-1   | 166.889    | 169.506    | 105.078    |
| Lys-2   | 165.062    | 167.885    | 114.669    |
| Lys-3   | 163.419    | 165.581    | 118.686    |
| Lys-4   | 163.672    | 166.420    | 122.910    |
| Lys-5   | 163.818    | 168.008    | 133.510    |
| BSA-1   | 158.139    | 90.399     | 61.297     |
| BSA-2   | 156.307    | 91.255     | 63.359     |
| BSA-3   | 155.620    | 92.440     | 64.812     |
| BSA-4   | 157.895    | 93.377     | 65.697     |
| BSA-5   | 157.614    | 94.995     | 67.864     |
| Try-1   | 58.204     | 89.734     | 61.567     |
| Try-2   | 59.500     | 93.031     | 61.719     |
| Try-3   | 59.517     | 93.760     | 62.354     |
| Try-4   | 59.481     | 94.484     | 62.687     |
| Try-5   | 59.905     | 95.984     | 65.544     |
| Pep-1   | 37.315     | 32.105     | 22.032     |
| Pep-2   | 38.893     | 33.263     | 24.410     |
| Pep-3   | 39.442     | 32.998     | 23.745     |
| Pep-4   | 39.350     | 33.624     | 24.105     |
| Pep-5   | 39.174     | 33.500     | 24.444     |

**TABLE S2:** Database of the  $\Delta$ RGB alterations of the  $[\text{AuCl}_4]^-$  and Glu mixture in the absence and presence of heavy metal ions (0.77  $\mu\text{M}$ ) after microwave reaction.

|                     | $\Delta\text{R}$ | $\Delta\text{G}$ | $\Delta\text{B}$ |
|---------------------|------------------|------------------|------------------|
| Blank-1             | 3.550            | 2.577            | -1.249           |
| Blank-2             | 1.602            | -1.500           | -5.215           |
| Blank-3             | 3.845            | -1.743           | -3.699           |
| Blank-4             | 4.842            | 1.884            | -2.146           |
| $\text{Mn}^{2+}$ -1 | -6.460           | -6.571           | 3.242            |
| $\text{Mn}^{2+}$ -2 | -7.660           | -8.318           | 4.041            |
| $\text{Mn}^{2+}$ -3 | -9.780           | -11.553          | -1.924           |
| $\text{Mn}^{2+}$ -4 | -4.335           | -4.648           | 6.009            |
| $\text{Co}^{2+}$ -1 | -22.014          | -27.528          | -32.308          |
| $\text{Co}^{2+}$ -2 | -22.404          | -30.130          | -33.425          |
| $\text{Co}^{2+}$ -3 | -24.035          | -32.138          | -36.976          |
| $\text{Co}^{2+}$ -4 | -23.752          | -28.211          | -37.278          |
| $\text{Cu}^{2+}$ -1 | -0.032           | -13.335          | -17.306          |
| $\text{Cu}^{2+}$ -2 | -0.741           | -16.363          | -18.991          |
| $\text{Cu}^{2+}$ -3 | -2.003           | -17.578          | -20.929          |
| $\text{Cu}^{2+}$ -4 | 0.817            | -14.518          | -17.239          |
| $\text{Cr}^{3+}$ -1 | -5.795           | -23.377          | -24.391          |
| $\text{Cr}^{3+}$ -2 | -8.245           | -27.450          | -28.217          |
| $\text{Cr}^{3+}$ -3 | -9.268           | -28.880          | -30.510          |
| $\text{Cr}^{3+}$ -4 | -7.165           | -25.566          | -27.523          |
| $\text{Ni}^{2+}$ -1 | -16.349          | -45.095          | -41.223          |
| $\text{Ni}^{2+}$ -2 | -17.569          | -49.746          | -40.525          |
| $\text{Ni}^{2+}$ -3 | -17.432          | -50.053          | -46.581          |
| $\text{Ni}^{2+}$ -4 | -15.685          | -47.878          | -43.056          |
| $\text{Hg}^{2+}$ -1 | -26.202          | -12.817          | -22.513          |
| $\text{Hg}^{2+}$ -2 | -25.910          | -13.880          | -22.151          |
| $\text{Hg}^{2+}$ -3 | -29.032          | -18.297          | -28.503          |
| $\text{Hg}^{2+}$ -4 | -25.500          | -12.586          | -21.207          |
| $\text{Cr(VI)}$ -1  | -0.624           | -6.802           | -8.326           |
| $\text{Cr(VI)}$ -2  | -0.350           | -8.345           | -9.577           |
| $\text{Cr(VI)}$ -3  | -0.114           | -7.042           | -8.288           |
| $\text{Cr(VI)}$ -4  | -1.040           | -8.543           | -10.729          |
| $\text{Zn}^{2+}$ -1 | -19.138          | -24.748          | -22.741          |
| $\text{Zn}^{2+}$ -2 | -20.670          | -23.321          | -24.414          |
| $\text{Zn}^{2+}$ -3 | -20.355          | -22.885          | -21.490          |
| $\text{Zn}^{2+}$ -4 | -18.718          | -25.786          | -23.763          |
| $\text{Pb}^{2+}$ -1 | -9.264           | -16.225          | -17.456          |
| $\text{Pb}^{2+}$ -2 | -8.198           | -17.013          | -16.078          |
| $\text{Pb}^{2+}$ -3 | -10.121          | -18.651          | -18.382          |
| $\text{Pb}^{2+}$ -4 | -7.107           | -19.552          | -18.985          |
